# Supplementary material for: Contrasting response of rainfall extremes to increase in surface air and dewpoint temperatures at urban locations in India
Source: PubMed Central journal article supplement (PMC5430704; doi:10.1038/s41598-017-01306-1), 2017-04-27
Supplement: 41598_2017_1306_MOESM1_ESM.pdf [file 41598_2017_1306_MOESM1_ESM.pdf]

## 1 Supplemental Information

2

### 3 **Contrasting response of rainfall extremes to increase in surface air and dewpoint** 4 **temperatures at urban locations in India**

5 Haider Ali and Vimal Mishra\*

6 Civil Engineering

7 Indian Institute of Technology (IIT) Gandhinagar, Gujarat, India

8 Corresponding author: vmishra@iitgn.ac.in

## 9 **Areal Reduction Factors**

10 We used areal reduction factors (ARF) to convert gridded rainfall (TRMM, CHIRPS) to point  
11 estimates. ARF is defined as the ratio of the average areal depth of rainfall and the average  
12 point depth, which can range from 0 to 1<sup>1,2</sup>. We considered five different ARFs in our study  
13 as listed below:

14 a) *U.S. Weather Bureau 1957 method (TP-29; arf1)*: In this method, ARF values are  
15 estimated as a ratio of an average annual-maximum areal precipitation depth for a given  
16 period to the average annual-maximum point precipitation depth in the area for the same  
17 period<sup>2-4</sup>. This method assumes that the relationship between depth and area is not influenced  
18 by the recurrence interval (frequency) of the point rainfall<sup>1</sup>.

19

20

$$ARF_{TP-29} = \frac{\frac{1}{n} \sum_{j=1}^n \hat{R}_j}{\frac{1}{k} \sum_{i=1}^k \left( \frac{1}{n} \sum_{j=1}^n R_{ij} \right)} \quad (1)$$

21 where  $\hat{R}_j$  is the annual maximum areal rainfall for year  $j$ ,  $R_{ij}$  is the annual maximum point  
 22 rainfall for year  $j$  at station  $i$ ,  $k$  is the number of stations in the area, and  $n$  is the number of  
 23 years<sup>2</sup>.

24 b) **Storm-centred ARFs (arf2)**: In this method, ARF is defined as a ratio of maximum areal  
 25 rainfall ( $P_{area}$ ) within the storm zone for a given area and duration to maximum point rainfall  
 26 ( $P_{point}$ ) within the same storm for the same duration period<sup>2-4</sup>.

$$27 \quad ARF = \frac{P_{area}}{P_{point}} \quad (2)$$

28 c) **Leclerc and Schaake method (1972; arf3)**: ARF is given by

$$29 \quad ARF = \frac{Z_E}{Z_T} = 1 - e^{-1.1t^{0.25}} + e^{(-1.1t^{0.25} - 0.01A)} \quad (3)$$

30 where  $Z_E$  is areal average effective precipitation,  $Z_T$  is total point precipitation,  $A$  is area in  
 31 square kilometer and  $t$  is temporal resolution of observed data<sup>5,6</sup>.

32 d) **ARF used in United Kingdom (NERC, 1975; arf4)**: ARF is given by

$$33 \quad ARF_{FSR} = \frac{1}{IJ} \sum_j \sum_i \frac{P'_{ij}}{P_{ij}} \quad (4)$$

34 where  $P'_{ij}$  is the annual maximum areal rainfall over a station  $i$  and year  $j$ ,  $P_{ij}$  is the annual  
 35 maximum point rainfall at each station  $i$  for year  $j$ ,  $A$  is the area of region,  $I$  is the total number  
 36 of stations in the region, and  $J$  is the record length (in years)<sup>4</sup>.

37 e) **ARF based on regression method (arf5)**: This arf is derived with a power best-fit  
 38 regression method and is expressed by

$$39 \quad ARF = 1.09(a^{-0.0667}) \quad (5)$$

40 where  $a$  is the area in square kilometer<sup>7</sup>.

41 We used gridded data from CHIRPS/Daily TRMM and applied these five different ARFs to  
42 estimate 90 to 99.9<sup>th</sup> percentiles of rainfall. We then compared these percentile values from  
43 those obtained using GSOD and estimated root mean square error (RMSE) for each location  
44 (Supplemental Table S2). We find that for *arf1* RMSE is minimum and it is maximum for  
45 *arf3*. Moreover, we estimated regression slopes using rainfall from CHIRPS and Daily  
46 TRMM with DPT/T850 for i) without applying any ARF, ii) with the best ARF method  
47 (*arf1*), and iii) with the worst ARF method (*arf3*) (Supplemental Figure S1). We observed  
48 similar scaling results for these three cases for the majority of locations, which shows that  
49 scaling results are weakly dependent on the choice of ARF for the selected locations.  
50 However, we still used *arf1* for converting gridded rainfall (from TRMM and CHIRPS) to  
51 point scale in our study.

52

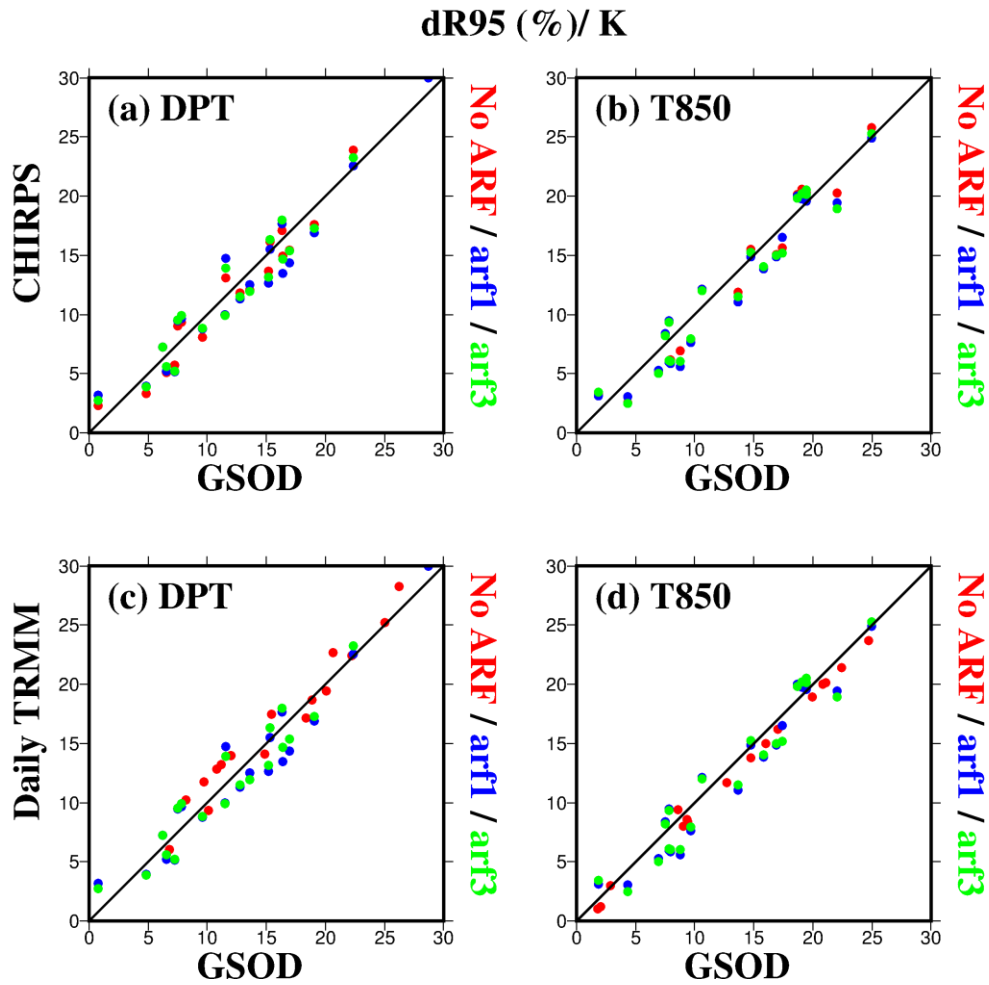

54

55 Supplemental Figure S1 (a) Agreement in scaling (dR95/K, %) results between GSOD and  
 56 CHIRPS with DPT, pooled for all 23 urban areas after applying no ARF (red), *arf1* (best  
 57 ARF; blue) and *arf3* (worst ARF; green) on gridded CHIRPS data, (b) same as (a) but for  
 58 T850 and (c-d) same as (a-b) but for Daily TRMM data. The figure was developed using the  
 59 Generic Mapping Tools (GMT, <https://www.soest.hawaii.edu/gmt/>).

60

61

## 62 **Mean sea level pressure (SLP) and T850 composites**

63 We obtained mean sea level pressure (SLP) data from the ERA-Interim reanalysis data for the  
64 period of 1979-2015. To understand the sea level pressure variability during the extreme  
65 rainfall events in urban areas, we developed composite maps of SLP and T850 anomalies.  
66 Similar to the method of Mishra et al.<sup>8</sup>, top 100 extreme rainfall events during the period of  
67 1979-2015 for each station were selected and SLP and T850 for each day of extreme rainfall  
68 events were extracted. T850 anomalies were estimated using the mean of the corresponding  
69 day for 30 years. Using T850 anomalies and SLP, we constructed composites for each city  
70 and different climatic zones taking mean of data for all the urban areas within that region.  
71 We also obtained moisture convergence data from the ERA-Interim reanalysis and developed  
72 composites of moisture convergence anomalies for the only top event for the period 1979-  
73 2015 for one representative urban area in each climatic zone. We did not consider more than  
74 1 event for moisture convergence composites as we found that maps with more events  
75 showed a little spatial variability probably due to different directions of the moisture  
76 transport. However, analysis of the top most extreme rainfall event showed the presence of  
77 moisture anomaly during the heavy rainfall event.

78

79 Supplemental Figure S2a shows daily mean T850 anomalies of 3K for the TWD climatic  
80 zone with positive anomalies in northwest and negative anomalies in the northeast and  
81 southern India. This explains precipitation growth associated with the ascent of air which  
82 developed in the frictional layer between cold and warm front<sup>8</sup>. The temperature gradient  
83 which is formed due to the movement of cold front results in rainfall. Kunkel et al.<sup>9</sup> reported  
84 that extreme rainfall increases with increase in temperature contrast between the two (cold  
85 and warm) air masses. Moreover, mean SLP pattern is low centred with a trough extending

86 towards southern India which resembles a cold front as shown in Mishra et al.<sup>8</sup>. Similar  
87 patterns were observed for the HST, TW, AR and SA climatic zones (Fig. S2b, d and e  
88 respectively). However, for the TW climatic zone, positive anomalies were spread over the  
89 most parts of India with negative anomalies in the northeast and southwest (Fig. S2c). We do  
90 not find any substantial variation in the standard deviation of T850 anomalies for the top 100  
91 rainfall events in urban areas within three climatic zones: TW, HST and TWD (Fig. S2f). The  
92 composite maps were developed for each urban areas to analyse the SLP and T850 conditions  
93 during extreme rainfall events ( Fig. S3). We also developed moisture convergence anomalies  
94 composites using the convergence data from the ERA-Interim reanalysis for the top rainfall  
95 events for one city in each climatic zone to show the role of moisture availability in the  
96 occurrence of rainfall extremes (Fig. S4). We notice positive moisture convergence  
97 anomalies in the region where urban areas are located and negative anomalies in regions  
98 away from urban areas indicating the moisture transport during the extreme rainfall events.  
99  
100

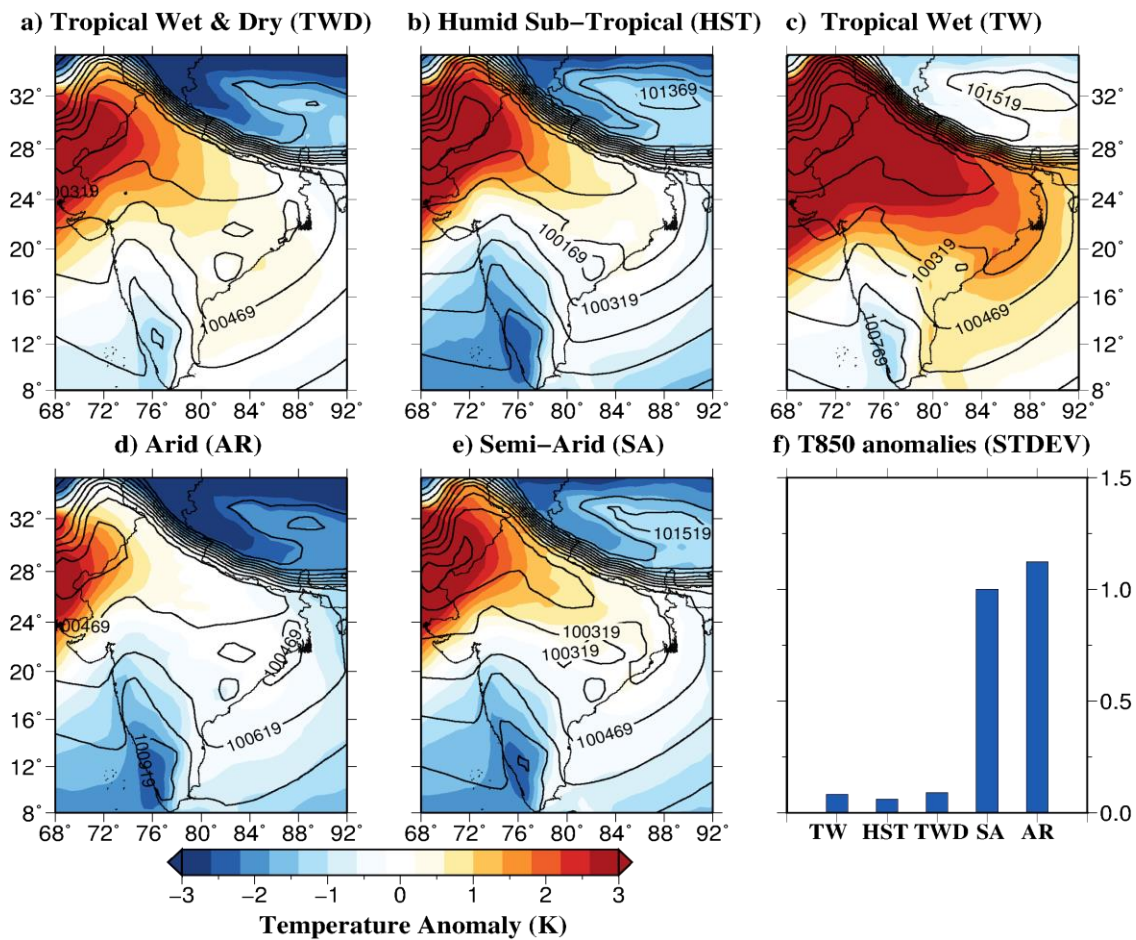

101

102 Supplemental Figure S2 (a-e) SLP and mean T850 anomalies composites for top 100 extreme  
 103 rainfall events for the period of 1979-2015 for different climatic zones, (f) standard deviation  
 104 in mean T850 anomalies for top 100 rainfall events for cities within different climatic zone.  
 105 The figure was developed using the Generic Mapping Tools (GMT,  
 106 <https://www.soest.hawaii.edu/gmt/>).

107





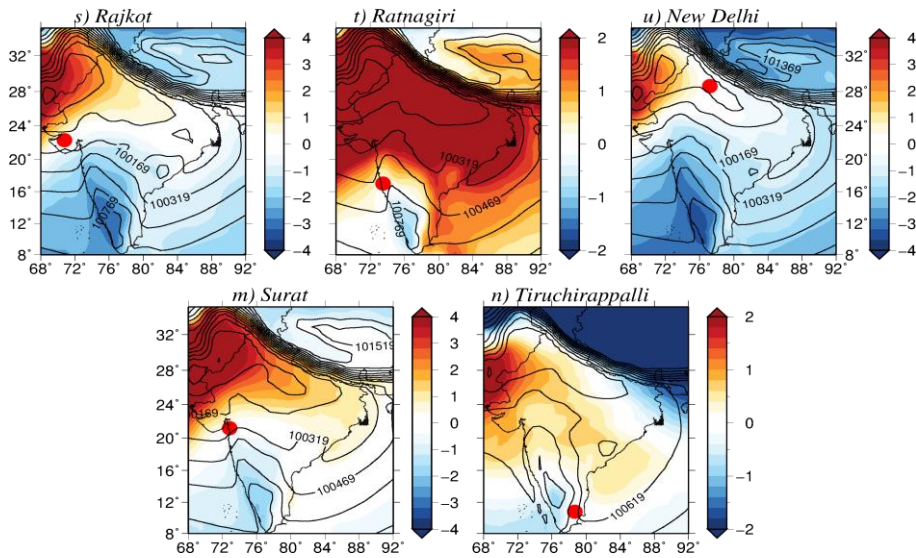

110

111 Supplemental Figure S3. Same as supplemental Figure S2 but for individual urban areas. The  
 112 figure was developed using the Generic Mapping Tools (GMT,  
 113 <https://www.soest.hawaii.edu/gmt/>).

114

115

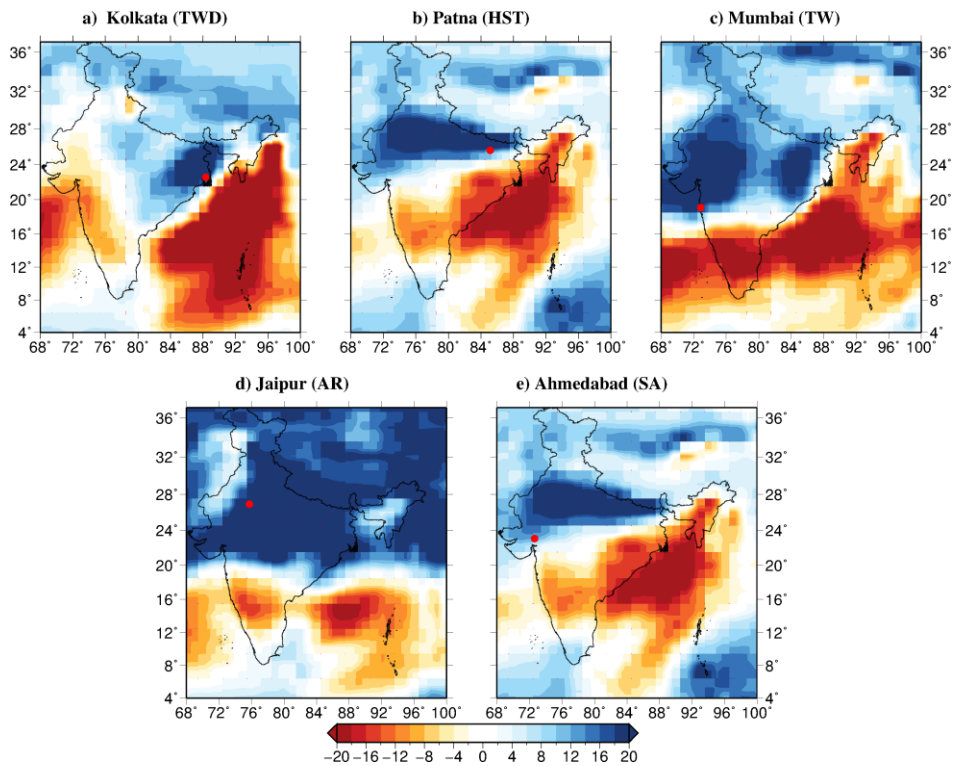

116

117 Supplemental Figure S4 (a-e) Moisture convergence anomalies (mm/day) for the top extreme  
 118 rainfall event for the period of 1979-2015 for one representative urban area in each climatic  
 119 zones. The figure was developed using the Generic Mapping Tools (GMT,  
 120 <https://www.soest.hawaii.edu/gmt/>).

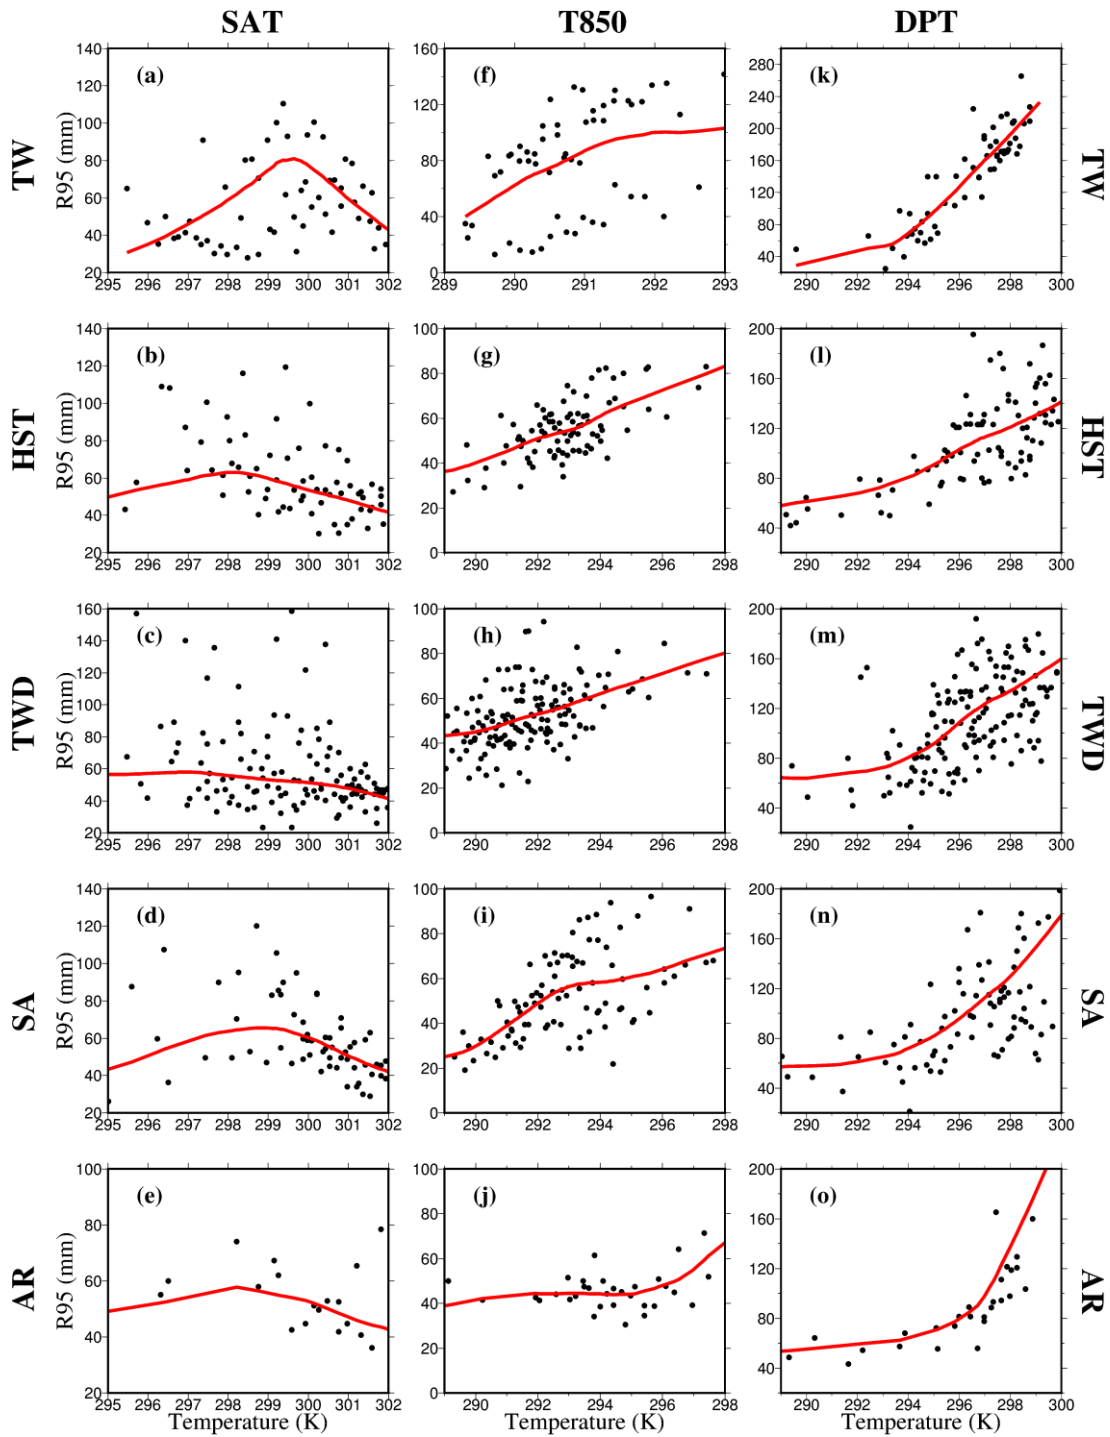

121

122 Supplemental Figure S5(a-e) Relationship between rainfall extremes (R95) obtained from  
 123 daily GSOD with daily surface air temperature (SAT) for all the climatic zones: TW, HST,  
 124 TWD, SA and AR respectively for the period of 1979-2015, (f-j) same as (a-e) but for daily  
 125 air temperature at 850 hPa (T850), and (k-o) same as (f-j) but for daily dewpoint temperature  
 126 (DPT). Red lines indicate fitted lines estimated using LOWESS. The figure was developed  
 127 using the Generic Mapping Tools (GMT, <https://www.soest.hawaii.edu/gmt/>).

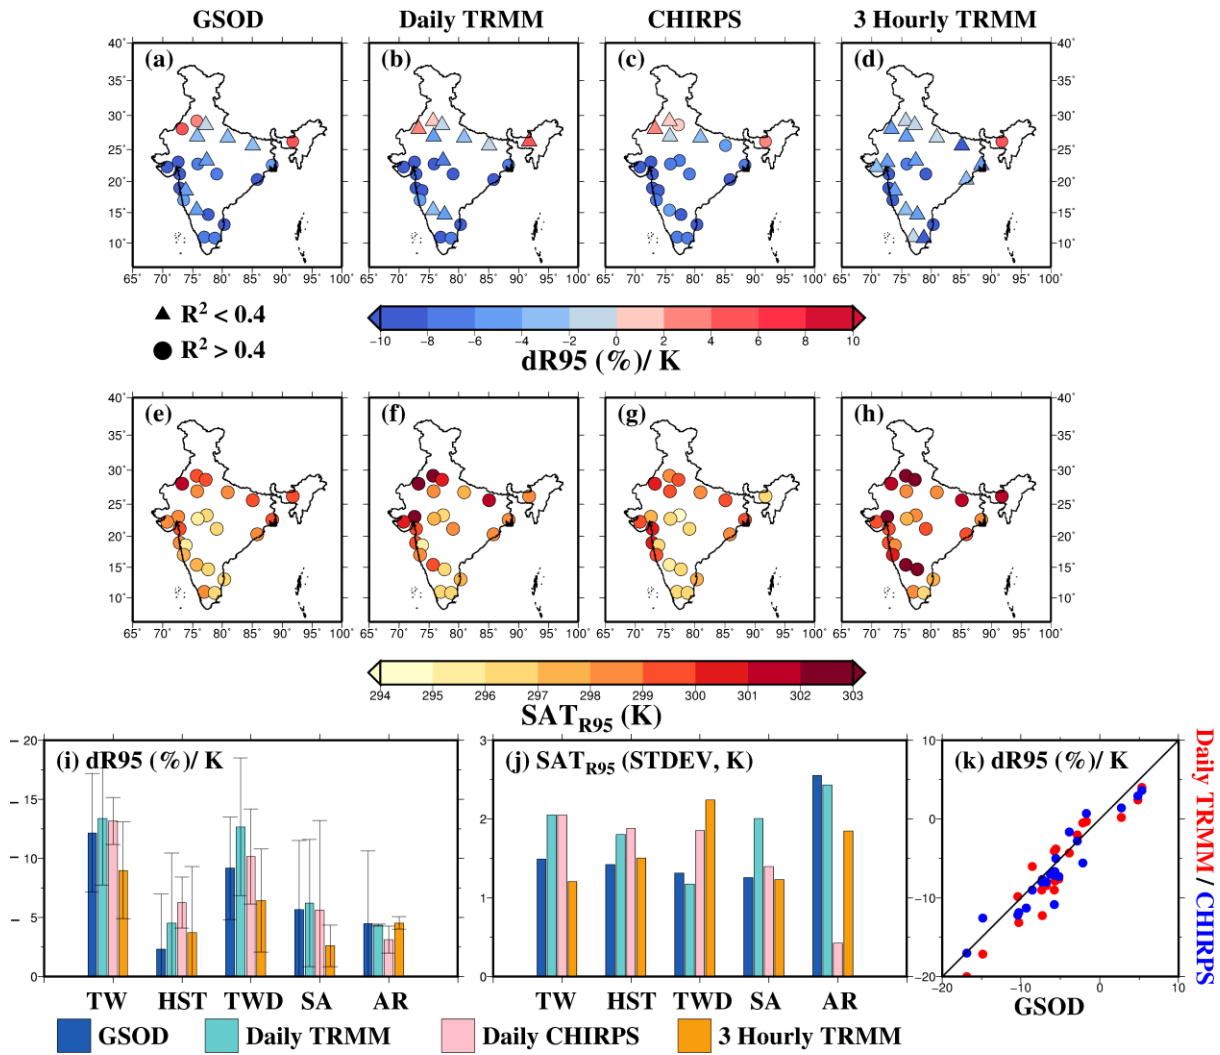

128

129 Supplemental Figure S6 (a-d) Regression slopes ( $dR95/K$ , %) of extreme rainfall obtained  
 130 from daily GSOD, daily TRMM, daily CHIRPS and 3-hourly TRMM data, respectively with  
 131 surface air temperature (SAT) for 23 urban areas across India using binning technique (BT),  
 132 (e-h) peak point temperature ( $SAT_{R95}$ ) for selected urban areas for same datasets respectively,  
 133 (i) regression slopes ( $dR95/K$ ) from daily GSOD (blue), daily TRMM (cyan), daily CHIRPS  
 134 (pink) and 3-hourly TRMM (orange) data for different climatic zones respectively where bars  
 135 denote mean values and whiskers show standard deviations, (j) same as (i) but for standard  
 136 deviations (STDEV) in  $SAT_{R95}$ , (k) agreement in scaling results between GSOD and Daily  
 137 TRMM (red) and GSOD and CHIRPS (blue), pooled for all 23 urban areas. The figure was  
 138 developed using the Generic Mapping Tools (GMT, <https://www.soest.hawaii.edu/gmt/>).

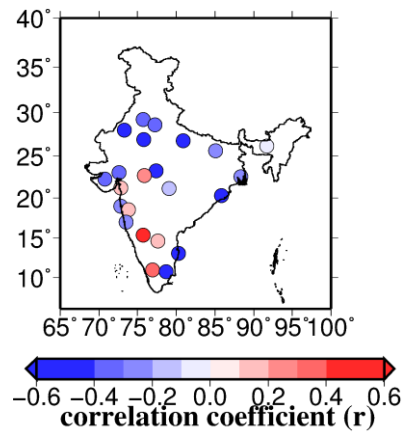

139

140 Supplemental Figure S7. Correlation coefficient (r) of total rainfall obtained from daily  
 141 GSOD with mean surface air temperature (SAT) for monsoon season (June-September) for  
 142 the period of 1979-2015 for 23 urban areas across India. The figure was developed using the  
 143 Generic Mapping Tools (GMT, <https://www.soest.hawaii.edu/gmt>).

144

145

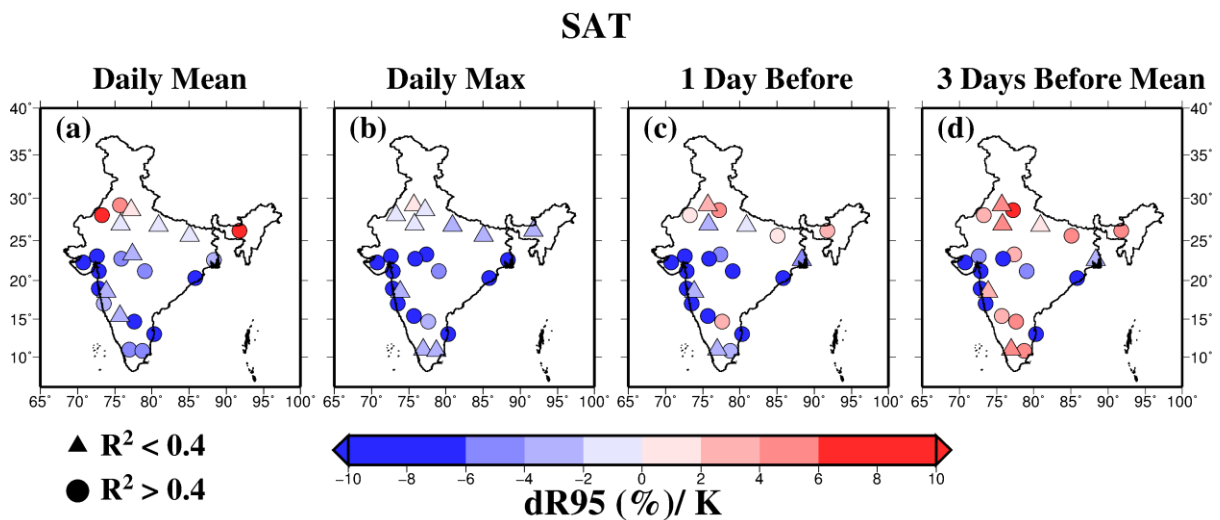

146

147

148 Supplemental Figure S8. Regression slopes (dR95/K, %) of extreme rainfall obtained from  
 149 daily GSOD data with (a) daily mean SAT, (b) daily maximum SAT, (c) daily mean SAT for  
 150 1 day prior to rain event and (d) daily mean SAT for 3 days prior to rain event. The figure  
 151 was developed using the Generic Mapping Tools (GMT, <https://www.soest.hawaii.edu/gmt>).

152

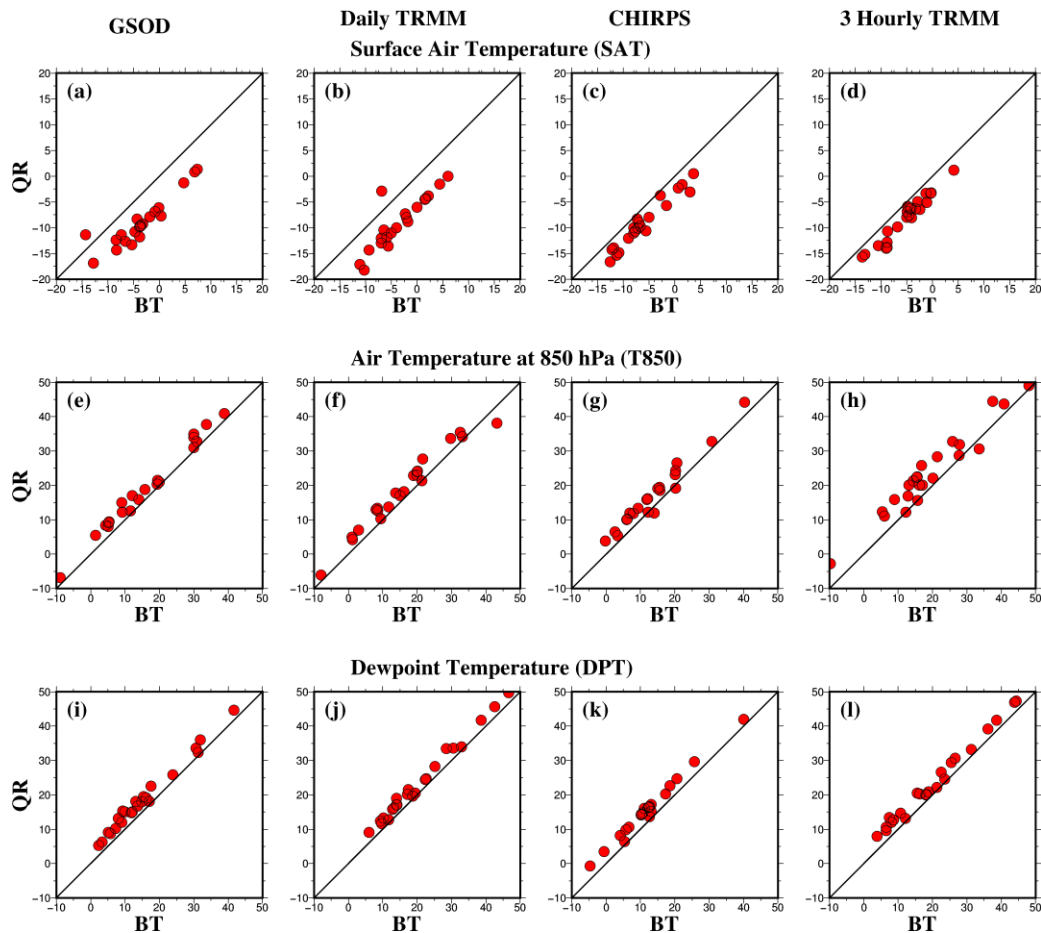

153

154 Supplemental Figure S9. (a-d) Agreement in scaling ( $dR95/K$ , %) results between binning  
 155 technique (BT) and quantile regression (QR) for GSOD, Daily TRMM, CHIRPS and 3-  
 156 hourly TRMM respectively with daily surface air temperature (SAT), pooled for all 23 urban  
 157 areas, (e-f) same as (a-d) but for daily air temperature at 850 hPa (T850), and (i-l) same as  
 158 (e-f) but for daily dewpoint temperature (DPT). The figure was developed using the Generic  
 159 Mapping Tools (GMT, <https://www.soest.hawaii.edu/gmt/>).

160

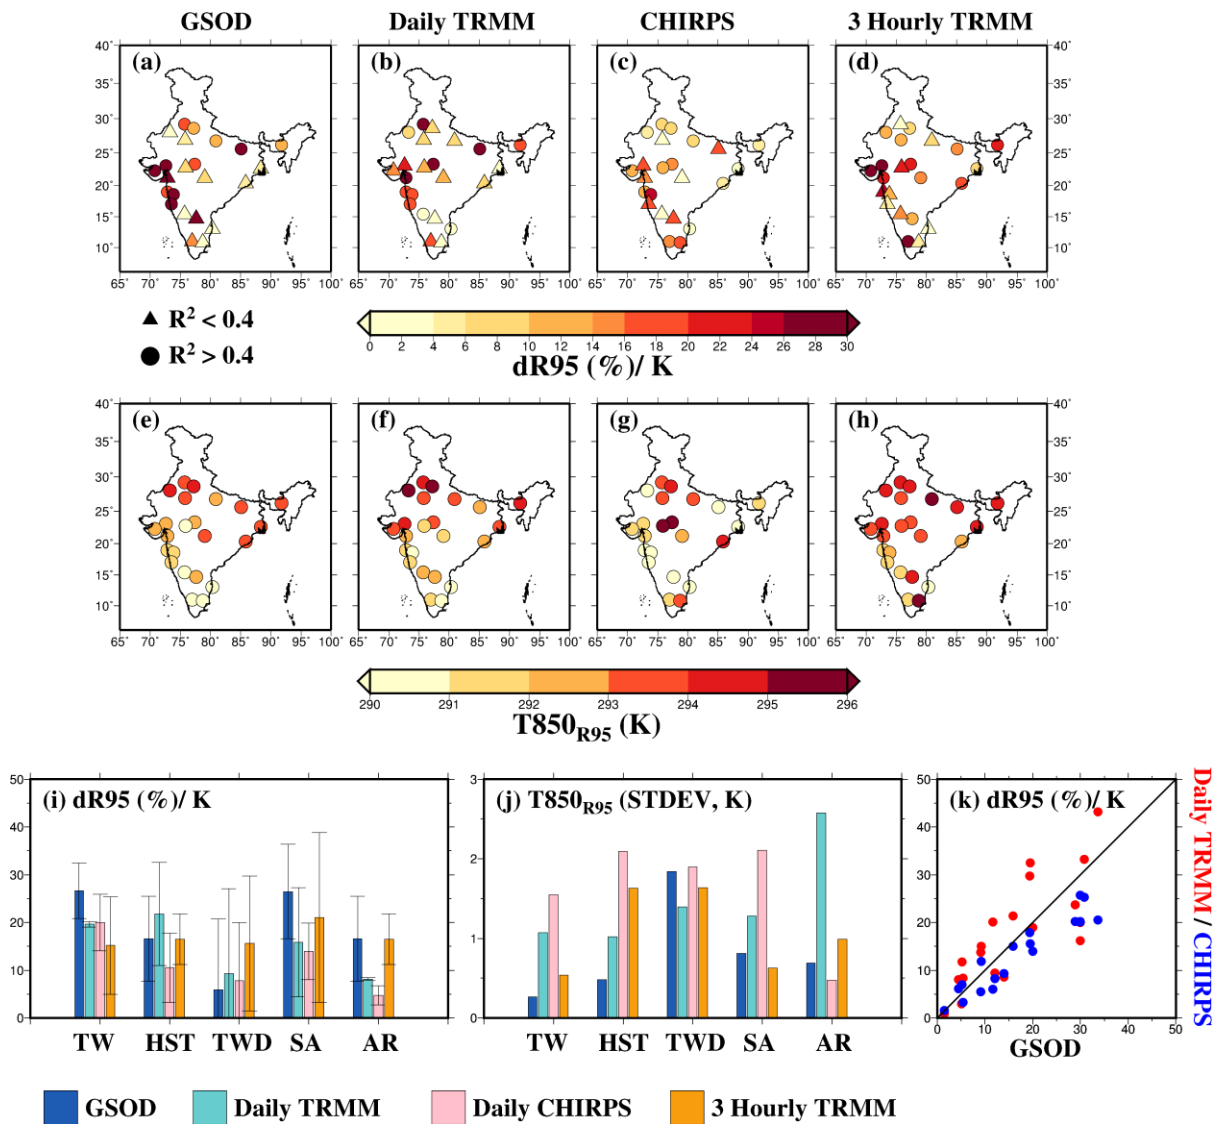

161

162 Supplemental Figure S10 (a-d) Regression slopes ( $dR95/K$ , %) of extreme rainfall obtained  
 163 from daily GSOD, daily TRMM, daily CHIRPS and 3-hourly TRMM data, respectively with  
 164 air temperature at 850 hPa ( $T850$ ) for 23 urban areas across India using binning technique  
 165 (BT), (e-h) peak point temperature ( $T850_{R95}$ ) for selected urban areas for same datasets  
 166 respectively, (i) regression slopes ( $dR95/K$ ) from daily GSOD (blue), daily TRMM (cyan),  
 167 daily CHIRPS (pink) and 3-hourly TRMM (orange) data for different climatic zones  
 168 respectively where bars denote mean values and whiskers show standard deviations, (j) same  
 169 as (i) but for standard deviations (STDEV) in  $T850_{R95}$ , (k) agreement in scaling results  
 170 between GSOD and Daily TRMM (red) and GSOD and CHIRPS (blue), pooled for all 23  
 171 urban areas. The figure was developed using the Generic Mapping Tools (GMT,  
 172 <https://www.soest.hawaii.edu/gmt/>).

173

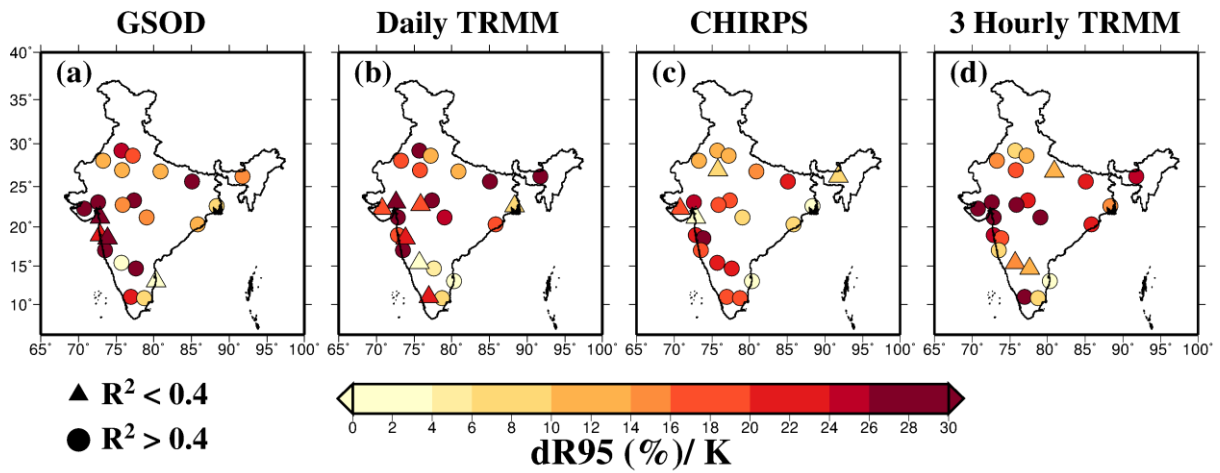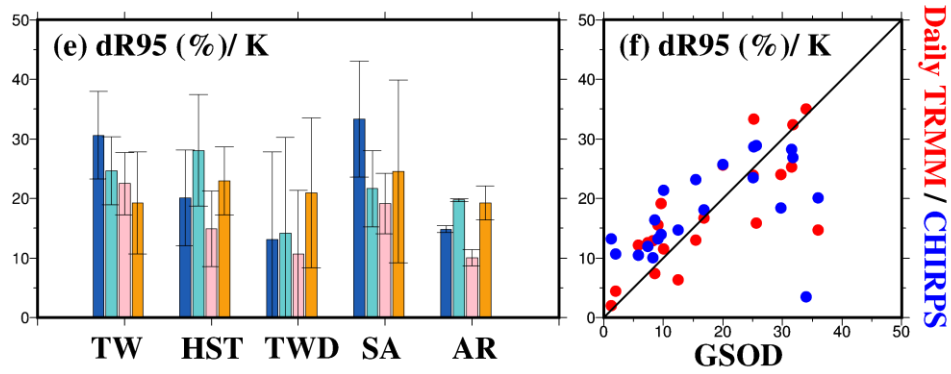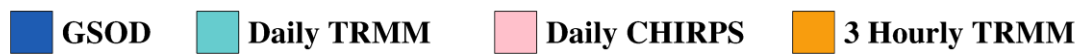

174

175 Supplemental Figure S11. Same as Figure 2 but for T850 obtained from MERRA2 reanalysis  
 176 data using quantile regression (QR). The figure was developed using the Generic Mapping  
 177 Tools (GMT, <https://www.soest.hawaii.edu/gmt/>).

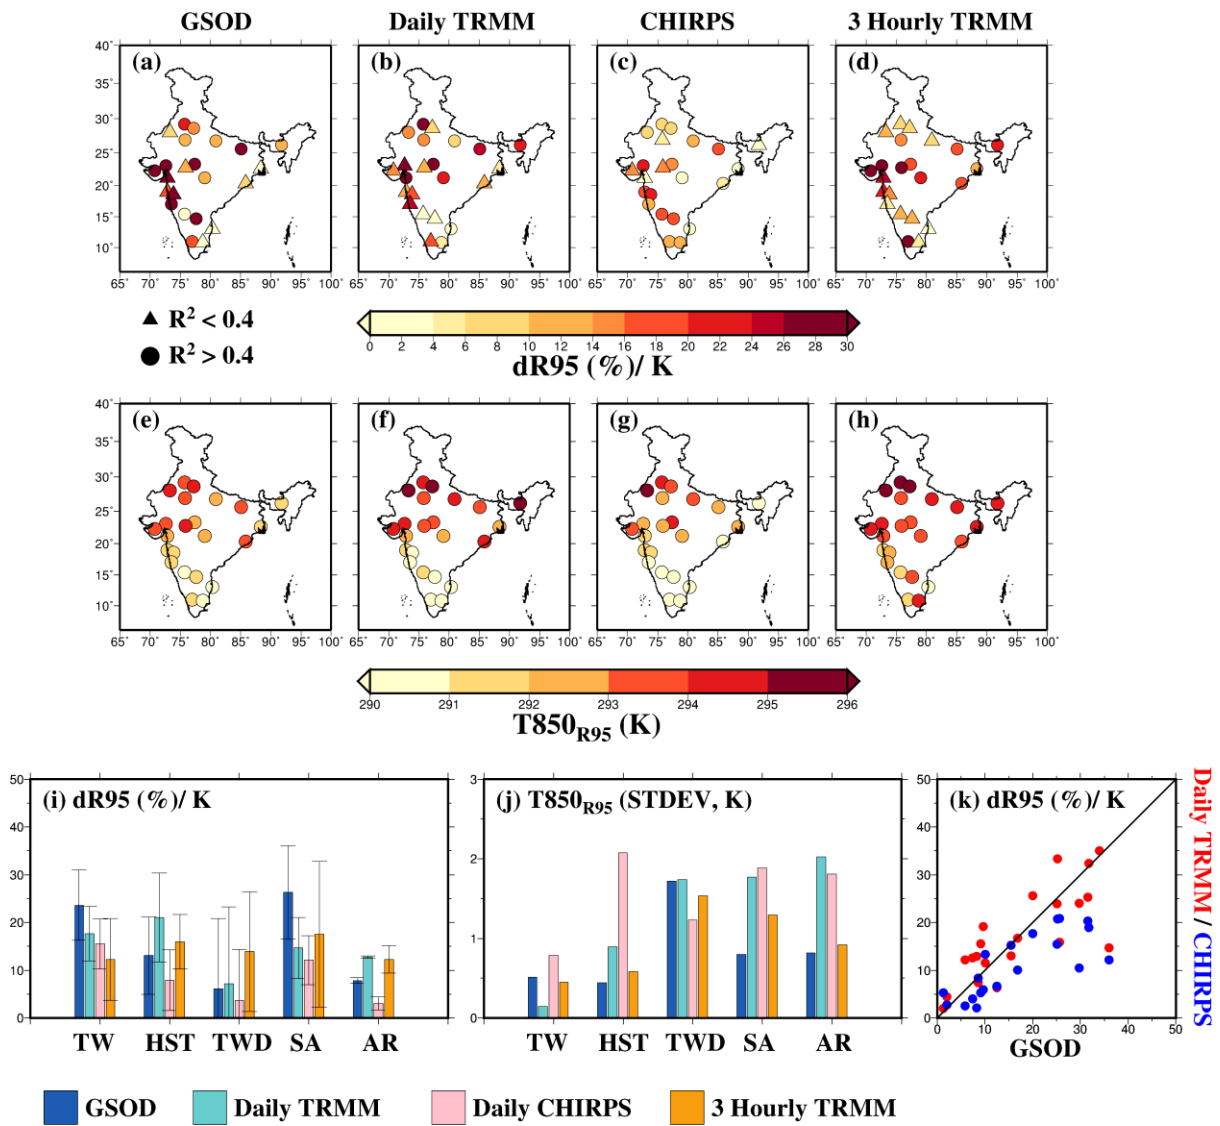

178

179 Supplemental Figure S12. Same as Supplemental Figure S11 but for T850 obtained from  
 180 MERRA2 reanalysis data using binning technique (BT). The figure was developed using the  
 181 Generic Mapping Tools (GMT, <https://www.soest.hawaii.edu/gmt/>).



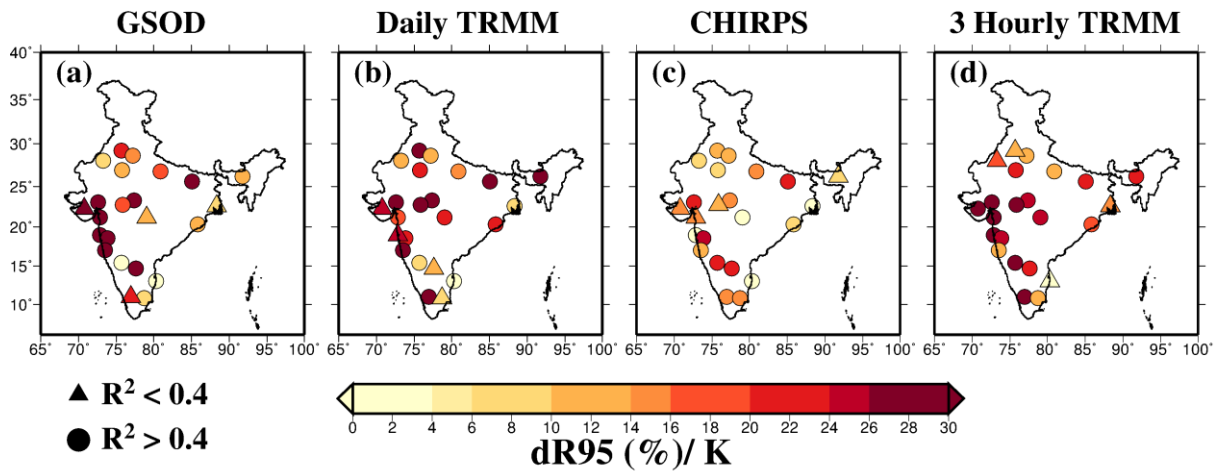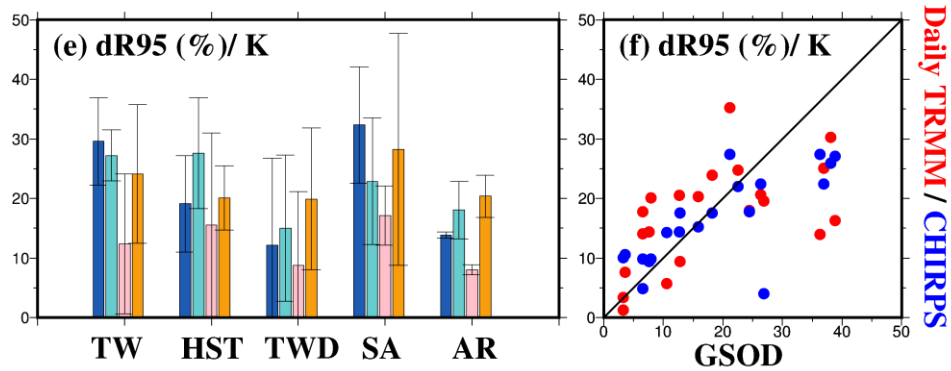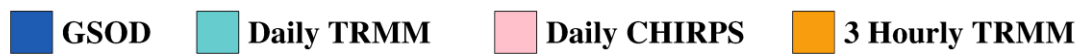

182

183 Supplemental Figure S13. Same as Figure 2 but for T850 obtained from CFSR reanalysis data  
 184 using quantile regression (QR) method. The figure was developed using the Generic Mapping  
 185 Tools (GMT, <https://www.soest.hawaii.edu/gmt/>).

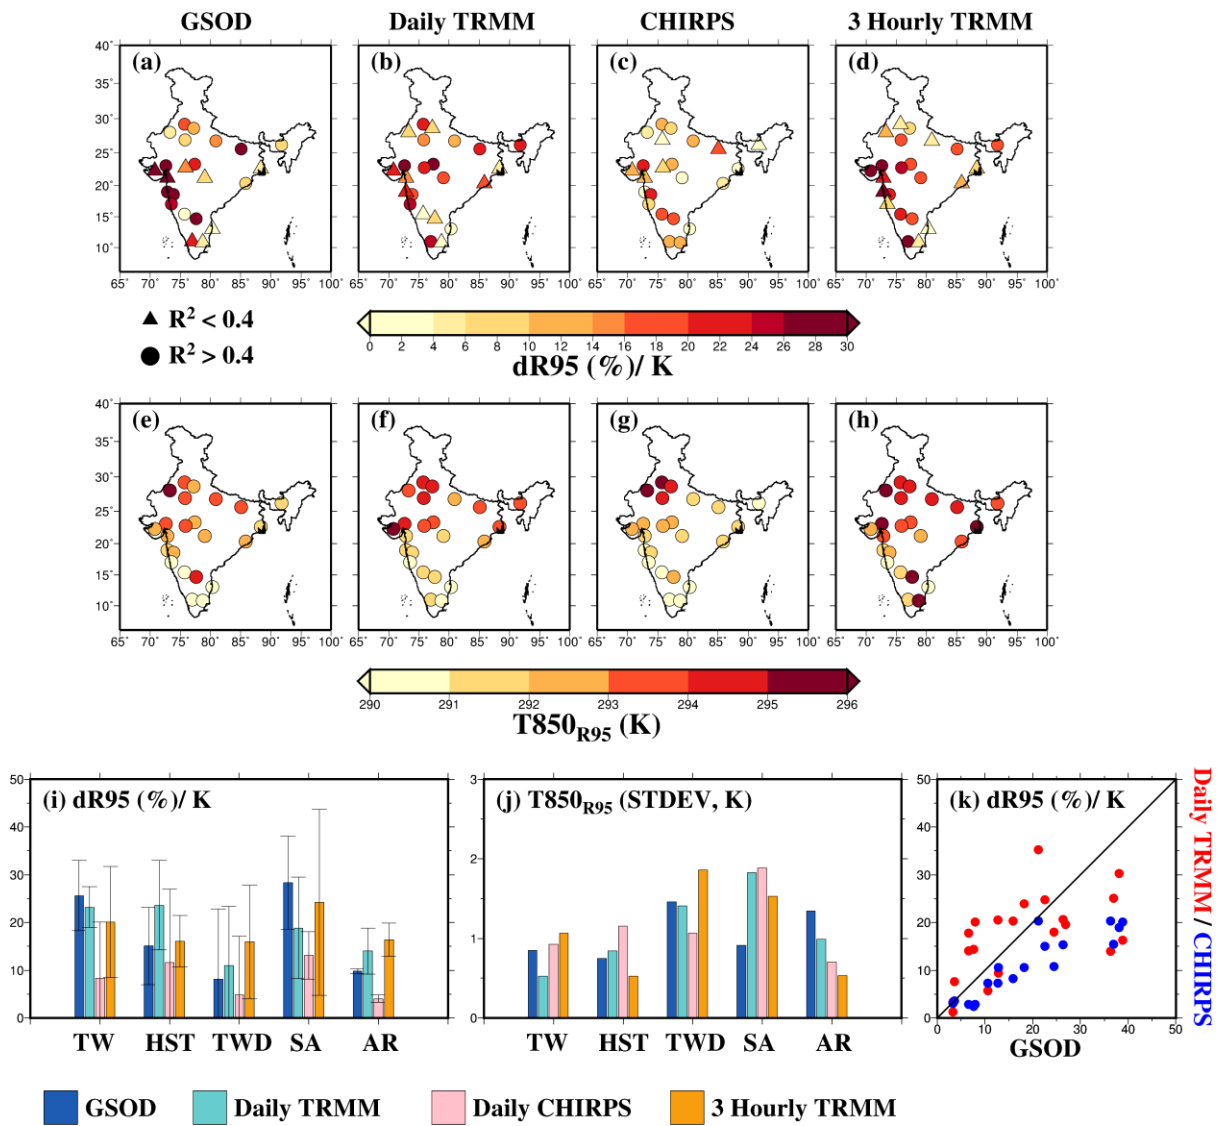

186

187 Supplemental Figure S14. Same as Supplemental Figure S11 but for T850 obtained from  
 188 CFSR reanalysis data using binning technique (BT) method. The figure was developed using  
 189 the Generic Mapping Tools (GMT, <https://www.soest.hawaii.edu/gmt/>).

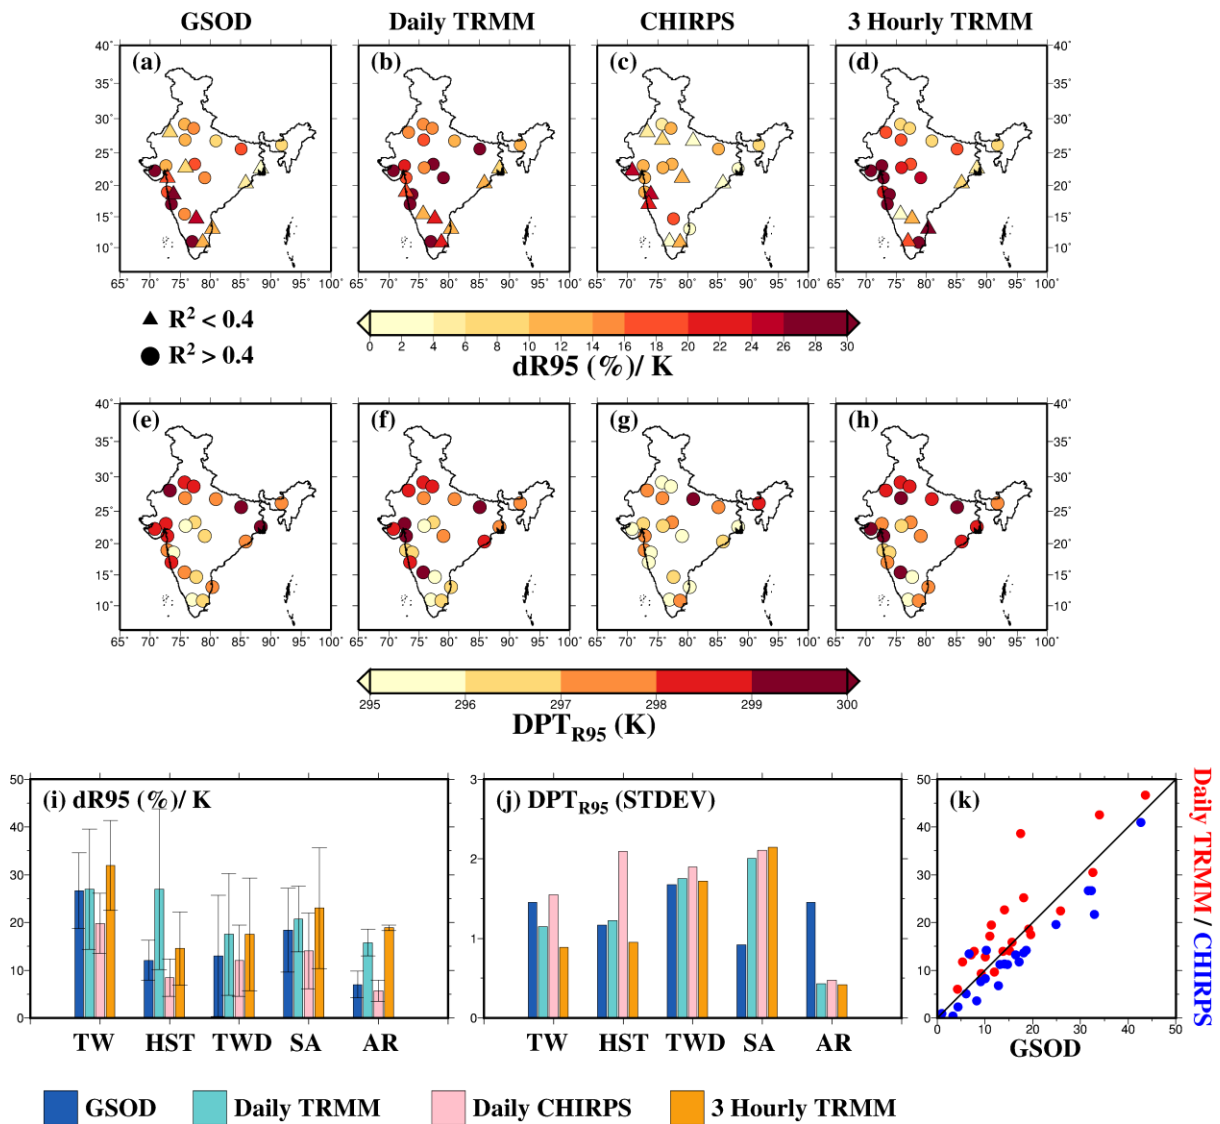

190

191 Supplemental Figure S15 (a-d) Regression slopes (dR95/K, %) of extreme rainfall obtained  
 192 from daily GSOD, daily TRMM, daily CHIRPS and 3-hourly TRMM data, respectively with  
 193 dewpoint temperature (DPT) for 23 urban areas across India using binning technique (BT),  
 194 (e-h) peak point temperature (DPT<sub>R95</sub>) for selected urban areas for same datasets respectively,  
 195 (i) regression slopes (dR95/K, %) from daily GSOD (blue), daily TRMM (cyan), daily  
 196 CHIRPS (pink) and 3-hourly TRMM (orange) data for different climatic zones respectively  
 197 where bars denote mean values and whiskers show standard deviations, (j) same as (i) but for  
 198 standard deviations (STDEV) in DPT<sub>R95</sub>, (k) agreement in scaling results between GSOD and  
 199 Daily TRMM (red) and GSOD and CHIRPS (blue), pooled for all 23 urban areas. The figure  
 200 was developed using the Generic Mapping Tools (GMT, <https://www.soest.hawaii.edu/gmt/>).

201

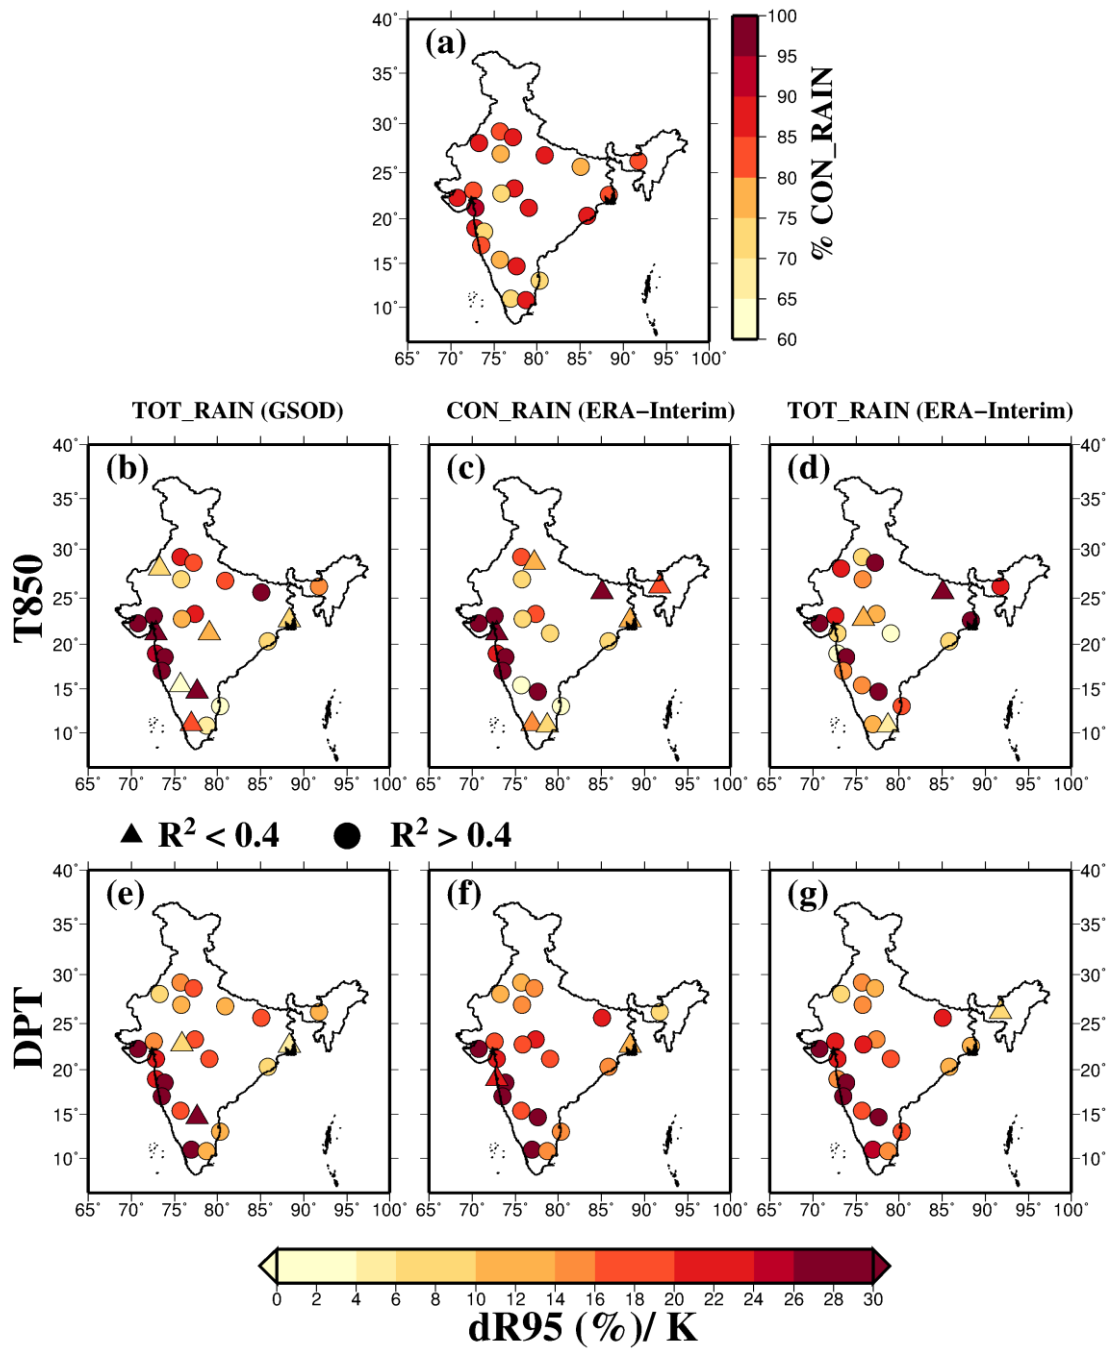

202

203 Supplemental Figure S16 (a) Percentage of convective rainfall (CON\_RAIN) in total rainfall  
 204 (TOT\_RAIN), obtained from ERA-Interim for the period of 1979-2015 for selected 23 cities  
 205 across India, (b) regression slopes (dR95/K, %) obtained from daily GSOD considering total  
 206 rainfall with air temperature at 850 hPa (T850) using quantile regression (QR) method at the  
 207 95th percentile, (c) same as (b) but for convective rainfall (CON\_RAIN) obtained from ERA-  
 208 Interim, (d) same as (c) but for total rainfall obtained from ERA-Interim reanalysis product,  
 209 (e-g) same as (b-d) respectively but for daily dewpoint temperature (DPT). The figure was  
 210 developed using the Generic Mapping Tools (GMT, <https://www.soest.hawaii.edu/gmt/>).

211

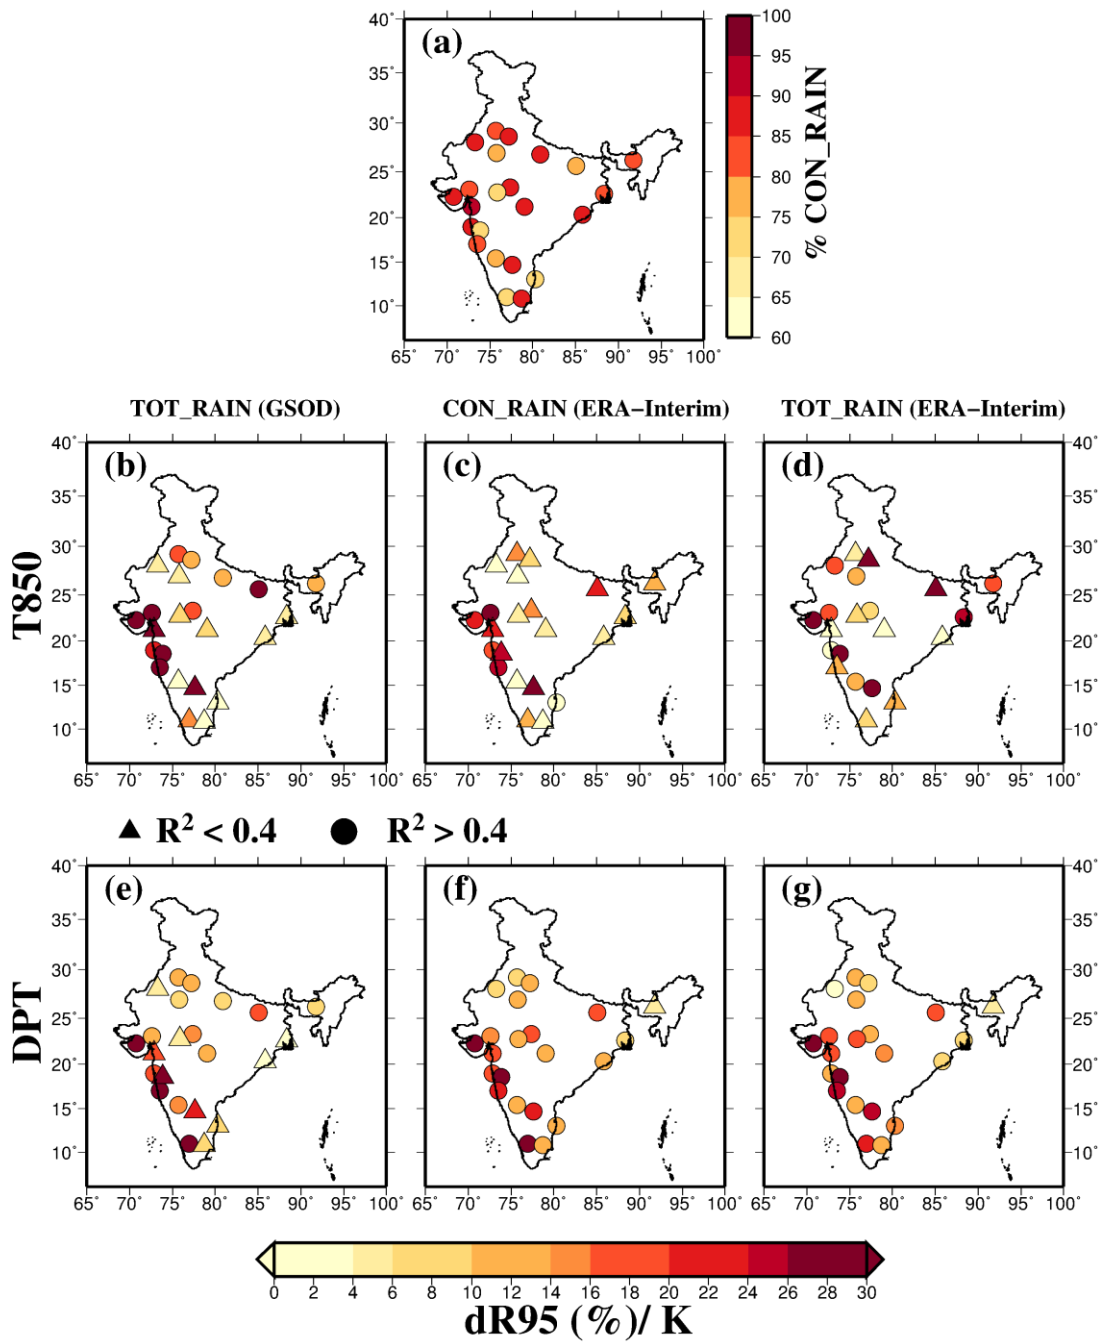

212

213 Supplemental Figure S17. Same as Supplemental Figure S16 but using binning technique  
 214 (BT). The figure was developed using the Generic Mapping Tools (GMT,  
 215 <https://www.soest.hawaii.edu/gmt/>).

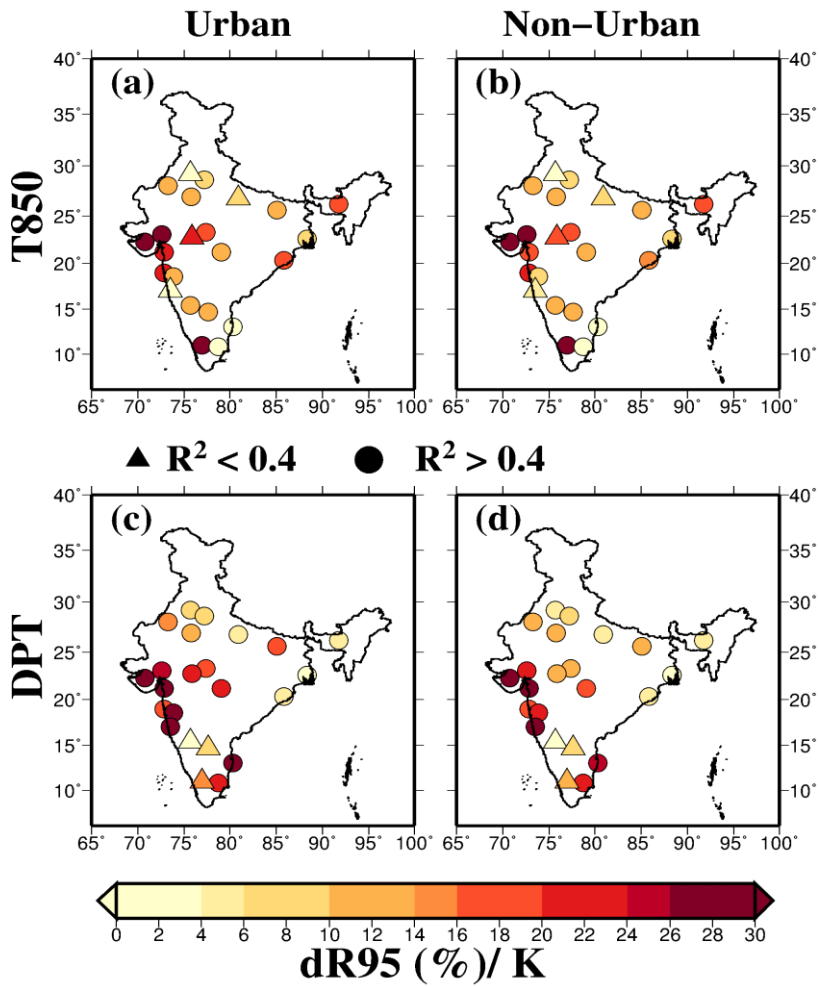

216

217 Supplemental Figure18 (a-b) Same as Figure 5 but using binning technique (BT). The figure  
 218 was developed using the Generic Mapping Tools (GMT, <https://www.soest.hawaii.edu/gmt/>).

219

220

221

222

223

224

225

226

227

228

### 1 day 50 year rainfall

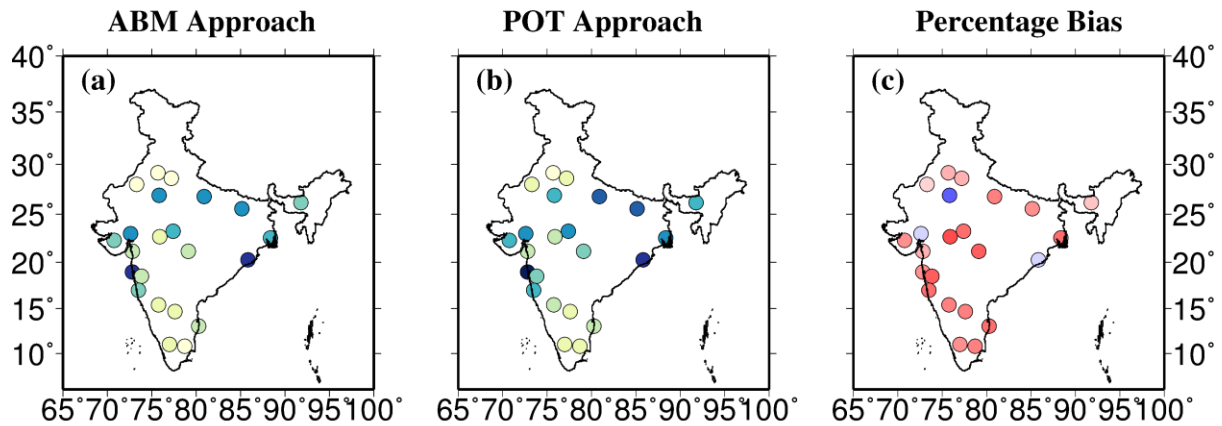

### 1 day 100 year rainfall

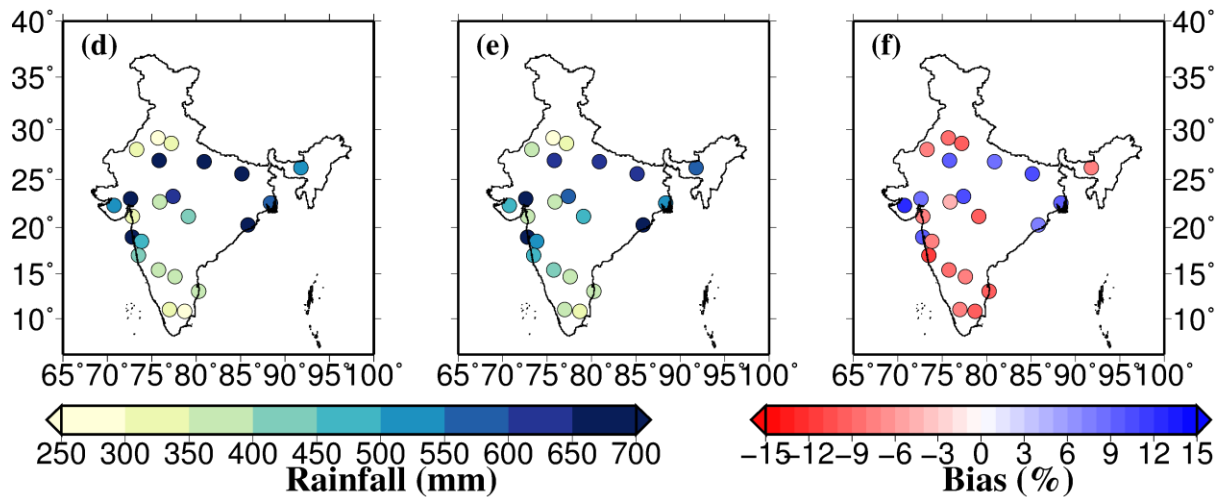

229

230 Supplemental Figure S19 (a) 1 day 50 year rainfall maxima (in mm) for 23 cities across India  
 231 assuming stationary conditions using annual block maxima (ABM) approach, (b) same as (a)  
 232 but using peak over threshold (POT) approach, (c) percentage bias in 1 day 50 year rainfall  
 233 maxima using ABM and POT approach considering stationary conditions, (d-f) same as (a-c)  
 234 respectively but for 1 day 100 year rainfall. The figure was developed using the Generic  
 235 Mapping Tools (GMT, <https://www.soest.hawaii.edu/gmt/>).

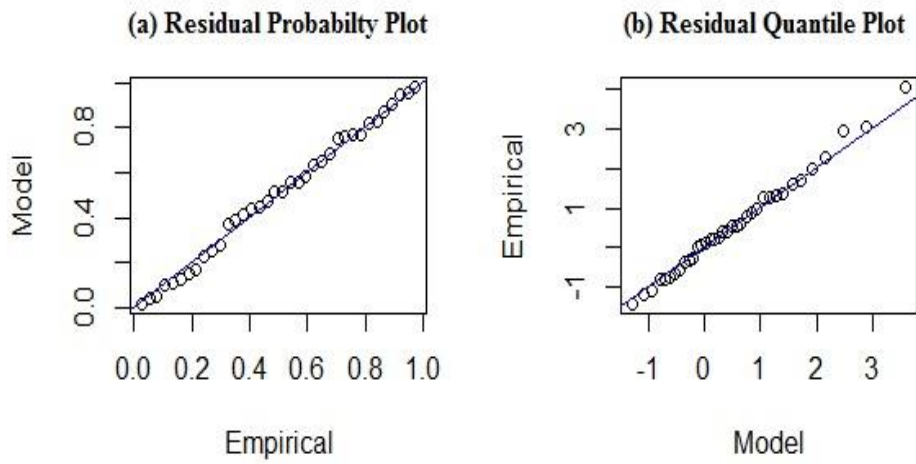

236

237 Supplemental Figure S20 (a) Residual Probability Plot for non-stationary GEV model using  
238 T850 and DPT as covariates, (b) same as (a) but Residual Quantile Plot. The figure was  
239 developed using "gev.diag" function in "ismev" package in statistical programming language  
240 'R'.

241



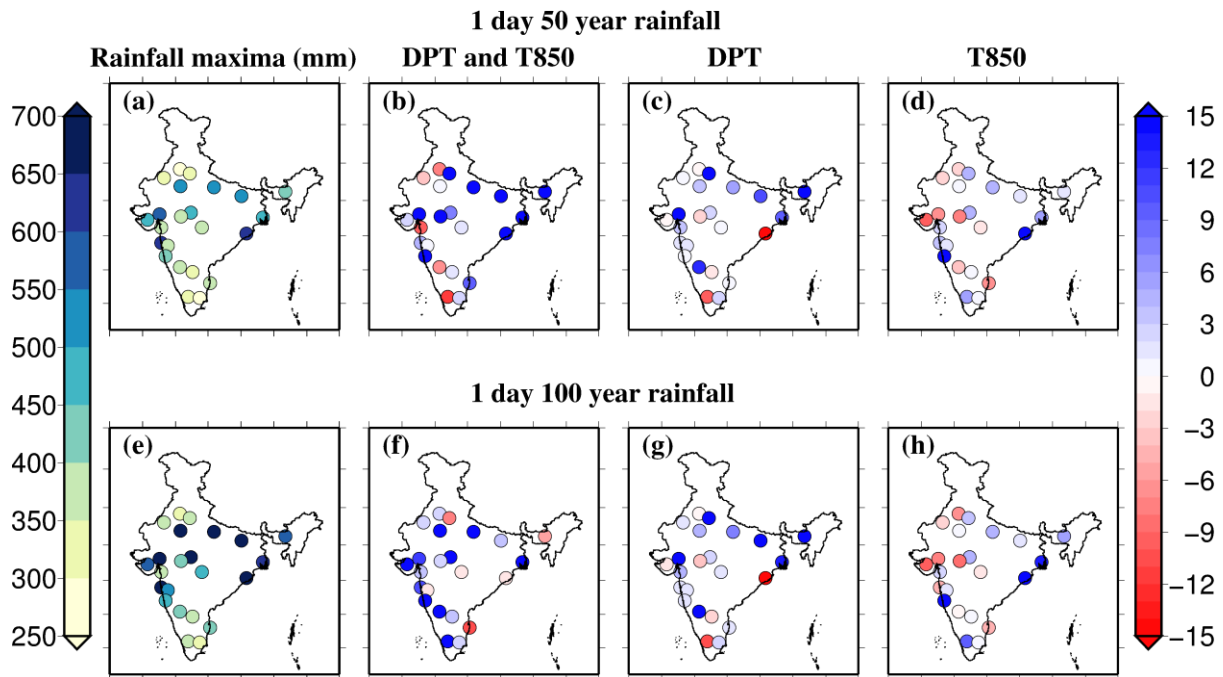

243

244 Supplemental Figure S21 (a) 1 day 50 year rainfall maxima (in mm) for 23 urban areas across  
 245 India assuming stationary conditions, (b) percentage change in 1 day 50 year rainfall maxima  
 246 considering stationary and nonstationary conditions using DPT and T850 as covariates (c)  
 247 same as (a) but for 1 day 100 year rainfall maxima, (c) same as (b) but using only DPT as  
 248 covariate, (d) same as (c) but using T850 as covariate, (e-f) same as (a-d) but for 1 day 100  
 249 year rainfall maxima. Return values were estimated using ismev package in "R". The figure  
 250 was developed using the Generic Mapping Tools (GMT, <https://www.soest.hawaii.edu/gmt/>).

251

252

253 Supplemental Table S1. Details (location, climate zones and distance from city center) of

254 selected urban areas.

| Station id | Name            | Longitude | Latitude | Climatic Zone | Distance from city center (km) |
|------------|-----------------|-----------|----------|---------------|--------------------------------|
| 1          | Ahmedabad       | 72.58     | 23.03    | SA            | 7.68                           |
| 2          | Bhopal          | 77.42     | 23.25    | HST           | 9.41                           |
| 3          | Bhubaneshwar    | 85.84     | 20.27    | TWD           | 3.69                           |
| 4          | Bikaner         | 73.31     | 28.02    | AR            | 2.43                           |
| 5          | Mumbai          | 72.83     | 18.98    | TW            | 12.72                          |
| 6          | Chennai         | 80.27     | 13.08    | TWD           | 13.56                          |
| 7          | Coimbatore      | 76.97     | 11.02    | TWD           | 2.24                           |
| 8          | Indore          | 75.9      | 22.7     | TWD           | 10.45                          |
| 9          | Nagpur          | 79.09     | 21.15    | HST           | 7.84                           |
| 10         | Gadag           | 75.75     | 15.4     | TWD           | 12.68                          |
| 11         | Guwahati        | 91.73     | 26.18    | HST           | 12.56                          |
| 12         | Hissar          | 75.7      | 29.2     | SA            | 5.82                           |
| 13         | Jaipur          | 75.8      | 26.9     | AR            | 8.54                           |
| 14         | Lucknow         | 80.9      | 26.8     | HST           | 4.472                          |
| 15         | Kolkata         | 88.37     | 22.57    | TWD           | 12.32                          |
| 16         | Patna           | 85.1      | 25.6     | HST           | 1.56                           |
| 17         | Anantapur       | 77.6      | 14.68    | SA            | 11.36                          |
| 18         | Pune            | 73.86     | 18.52    | TW            | 9.22                           |
| 19         | Rajkot          | 70.78     | 22.3     | SA            | 1.01                           |
| 20         | Ratnagiri       | 73.5      | 17       | TW            | 7.37                           |
| 21         | New Delhi       | 77.21     | 28.61    | SA            | 2.8                            |
| 22         | Surat           | 72.83     | 21.17    | TWD           | 3.35                           |
| 23         | Tiruchirappalli | 78.69     | 10.81    | TWD           | 5.46                           |

255

256 SA: Semi Arid

257 HST: Humid Sub Tropical

258 TWD: Tropical Wet and Dry

259 TW: Tropical Wet and Dry

260 AR: Arid zone

261 Supplemental Table S2. Root mean square error (RMSE) of different percentile (90<sup>th</sup>, 95<sup>th</sup>,  
262 97<sup>th</sup>, 99<sup>th</sup> and 99.9<sup>th</sup>) of rainfall using daily GSOD and daily CHIRPS, after applying different  
263 ARFs on gridded CHIRPS data.

264

| Station No. | No ARF | <i>arf1</i> | <i>arf2</i> | <i>arf3</i> | <i>arf4</i> | <i>arf5</i> |
|-------------|--------|-------------|-------------|-------------|-------------|-------------|
| 1           | 121.09 | 78.90       | 120.33      | 131.66      | 90.12       | 115.87      |
| 2           | 92.40  | 51.83       | 61.83       | 115.71      | 91.65       | 87.29       |
| 3           | 113.31 | 67.16       | 81.76       | 101.99      | 112.58      | 108.26      |
| 4           | 140.75 | 121.57      | 128.86      | 98.76       | 140.49      | 138.95      |
| 5           | 82.31  | 196.63      | 126.12      | 208.45      | 81.54       | 78.65       |
| 6           | 56.43  | 89.23       | 46.34       | 285.13      | 55.13       | 47.80       |
| 7           | 78.98  | 44.39       | 57.25       | 41.71       | 78.51       | 75.70       |
| 8           | 68.87  | 37.02       | 38.29       | 130.14      | 68.07       | 63.44       |
| 9           | 97.00  | 64.53       | 75.07       | 78.50       | 96.49       | 93.49       |
| 10          | 74.47  | 13.16       | 29.25       | 126.75      | 73.49       | 67.68       |
| 11          | 43.05  | 43.47       | 23.86       | 154.55      | 42.25       | 37.63       |
| 12          | 60.95  | 19.50       | 31.53       | 83.93       | 60.29       | 56.39       |
| 13          | 131.30 | 102.30      | 112.55      | 89.39       | 130.87      | 128.36      |
| 14          | 148.83 | 114.01      | 125.83      | 209.33      | 148.30      | 145.16      |
| 15          | 100.96 | 55.10       | 67.59       | 117.14      | 100.16      | 95.49       |
| 16          | 148.56 | 112.79      | 125.72      | 192.32      | 148.04      | 145.02      |
| 17          | 113.71 | 93.38       | 101.02      | 72.23       | 113.43      | 111.78      |
| 18          | 148.64 | 122.71      | 131.09      | 123.18      | 148.22      | 145.76      |
| 19          | 121.21 | 71.57       | 86.72       | 116.42      | 120.40      | 115.64      |
| 20          | 55.10  | 102.24      | 197.87      | 219.97      | 57.08       | 71.13       |
| 21          | 63.36  | 38.11       | 43.60       | 83.41       | 62.86       | 59.97       |
| 22          | 74.73  | 84.62       | 55.98       | 258.40      | 73.66       | 67.65       |
| 23          | 52.12  | 15.18       | 18.36       | 105.32      | 51.36       | 46.90       |

265

266

267

268

269

270 Supplemental Table S3. Deviance Statistic (D) test to evaluate improvement in the non-  
 271 stationary GEV model over stationary GEV model.

| S.No | Station         | Negative log-likelihood (nlh) |                | Deviance Statistic(D) |
|------|-----------------|-------------------------------|----------------|-----------------------|
|      |                 | Stationary                    | Non-stationary |                       |
| 1    | Ahmedabad       | 190.19                        | 187.88         | 4.62                  |
| 2    | Bhopal          | 183.51                        | 181.47         | 4.08                  |
| 3    | Bhubaneshwar    | 193.77                        | 191.23         | 5.08                  |
| 4    | Bikaner         | 173.43                        | 171.24         | 4.39                  |
| 5    | Mumbai          | 188.54                        | 186.47         | 4.15                  |
| 6    | Chennai         | 188.33                        | 186.22         | 4.23                  |
| 7    | Coimbatore      | 176.69                        | 173.27         | 6.84                  |
| 8    | Indore          | 184.19                        | 182.05         | 4.27                  |
| 9    | Nagpur          | 182.31                        | 180.04         | 4.54                  |
| 10   | Gadag           | 183.98                        | 182.02         | 3.91                  |
| 11   | Guwahati        | 181.06                        | 179.08         | 3.96                  |
| 12   | Hissar          | 178.09                        | 173.23         | 9.72                  |
| 13   | Jaipur          | 180.56                        | 178.52         | 4.08                  |
| 14   | Lucknow         | 188.03                        | 184.31         | 7.44                  |
| 15   | Kolkata         | 190.77                        | 188.45         | 4.65                  |
| 16   | Patna           | 182.92                        | 181.00         | 3.85                  |
| 17   | Anantapur       | 176.56                        | 174.49         | 4.12                  |
| 18   | Pune            | 176.76                        | 174.71         | 4.10                  |
| 19   | Rajkot          | 192.52                        | 190.30         | 4.43                  |
| 20   | Ratnagiri       | 185.69                        | 183.04         | 5.30                  |
| 21   | New Delhi       | 176.04                        | 174.04         | 4.00                  |
| 22   | Surat           | 194.72                        | 190.38         | 8.68                  |
| 23   | Tiruchirappalli | 179.44                        | 177.43         | 4.03                  |

272

273

274

275 Supplemental Table S4. PSR test to examine Non-Stationarity.

| S.No | Station         | p-value for T | Non stationarity |
|------|-----------------|---------------|------------------|
| 1    | Ahmedabad       | 0             | Yes              |
| 2    | Bhopal          | 0             | Yes              |
| 3    | Bhubaneshwar    | 0             | Yes              |
| 4    | Bikaner         | 0             | Yes              |
| 5    | Mumbai          | 0             | Yes              |
| 6    | Chennai         | 0             | Yes              |
| 7    | Coimbatore      | 0             | Yes              |
| 8    | Indore          | 0             | Yes              |
| 9    | Nagpur          | 0             | Yes              |
| 10   | Gadag           | 0             | Yes              |
| 11   | Guwahati        | 0             | Yes              |
| 12   | Hissar          | 0             | Yes              |
| 13   | Jaipur          | 0             | Yes              |
| 14   | Lucknow         | 0             | Yes              |
| 15   | Kolkata         | 0             | Yes              |
| 16   | Patna           | 0             | Yes              |
| 17   | Anantapur       | 0             | Yes              |
| 18   | Pune            | 0             | Yes              |
| 19   | Rajkot          | 0             | Yes              |
| 20   | Ratnagiri       | 0             | Yes              |
| 21   | New Delhi       | 0             | Yes              |
| 22   | Surat           | 0             | Yes              |
| 23   | Tiruchirappalli | 0             | Yes              |

276

277

279 **References**

280

- 281 1. Asquith, W. H. Areal-reduction factors for the precipitation of the 1-day design storm in  
282 Texas. US Geological Survey, WaterResources Investigations Report 99-4267, Austin,  
283 Tex., 81 (1999).  
284
- 285 2. Allen, Robert J., and Arthur T. DeGaetano. "Areal reduction factors for two eastern United  
286 States regions with high rain-gauge density." *Journal of Hydrologic Engineering* **10**, no. 4,  
287 327-335 (2005)
- 288 3. Olivera, Francisco, et al. "Estimation of average rainfall areal reduction factors in Texas  
289 using NEXRAD data." *Journal of Hydrologic Engineering* **13**, no. 6, 438-448 (2008).
- 290 4. Svensson, Cecilia, and David A. Jones. "Review of methods for deriving areal reduction  
291 factors." *Journal of Flood Risk Management* **3**, no. 3, 232-245 (2010).
- 292 5. Mishra, Vimal, Francina Dominguez, and Dennis P. Lettenmaier. "Urban precipitation  
293 extremes: How reliable are regional climate models?." *Geophysical Research Letters* **39**,  
294 no. 3 (2012).
- 295 6. Tripathi, Om P., and Francina Dominguez. "Effects of spatial resolution in the simulation  
296 of daily and subdaily precipitation in the southwestern US." *Journal of Geophysical*  
297 *Research: Atmospheres* **118**, no. 14, 7591-7605 (2013).
- 298 7. Lincoln, W. Scott, Katie E. Landry-Guyton, and David S. Schlotzhauer. "Creation of  
299 Rainfall Areal Reduction Factors from the Basin-Averaged Rainfall Record at the Lower  
300 Mississippi River Forecast Center", LMRFC Technical Report , National Weather Service  
301 (2016).
- 302 8. Mishra, V., Wallace, J. M. & Lettenmaier, D. P. Relationship between hourly extreme  
303 precipitation and local air temperature in the United States: Extreme Precipitation And  
304 Temperature. *Geophys. Res. Lett.* **39**, no. 16 (2012).  
305
- 306 9. Kunkel, Kenneth E., David R. Easterling, David AR Kristovich, Byron Gleason, Leslie  
307 Stoecker, and Rebecca Smith. "Meteorological causes of the secular variations in observed  
308 extreme precipitation events for the conterminous United States." *Journal of*  
309 *Hydrometeorology* . **3**, 1131-1141 (2012).  
310
